# Supplementary material for: A silver nanoparticle embedded hydrogel as a substrate for surface contamination analysis by surface-enhanced Raman scattering
Source: Royal Society of Chemistry journal article supplement (doi:10.1039/c4an00968a), 2014-01-01
Supplement: c4an00968a1.pdf [file c4an00968a1.pdf]

## Supporting Information

### Silver Nanoparticles Embedded Hydrogel as a Substrate for Surface Contamination Analysis by Surface-Enhanced Raman Scattering

Zhengjun Gong,<sup>1</sup> Canchen Wang,<sup>1,2</sup> Cong Wang,<sup>2</sup> Changyu Tang,<sup>2</sup> Fansheng  
Cheng,<sup>2</sup> Hongjie Du,<sup>1,2</sup> Meikun Fan,<sup>1\*</sup> and Alexandre Brolo<sup>3\*</sup>

<sup>1</sup>Faculty of Geosciences and Environmental Engineering, Southwest Jiaotong  
University, Chengdu, Sichuan, 610031, China.

<sup>2</sup>Chengdu Green Energy and Green Manufacturing R&D Centre, Chengdu, Sichuan,  
610207, China

<sup>3</sup>Department of Chemistry, University of Victoria, PO Box 3055, Victoria, BC V8W  
3V6, Canada

E-mail: [meikunfan@gmail.com](mailto:meikunfan@gmail.com), [agbrolo@uvic.ca](mailto:agbrolo@uvic.ca)

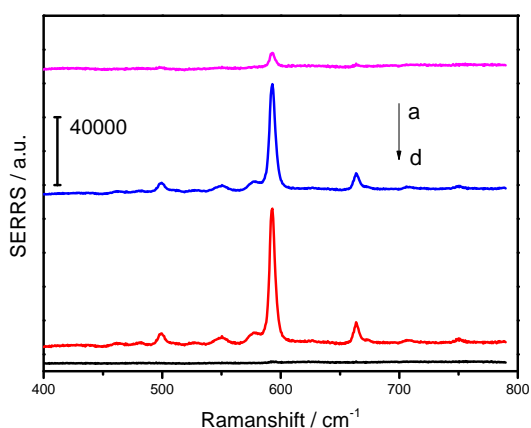

**Figure s1.** Effect of PVA concentration on SERS performance: (a-d) 8%, 6%, 4%, 2% PVA (w:w), respectively. Laser power, 300  $\mu$ W; Integration time, 500 ms  $\times$  5.

From Fig. s1 it is clear that 4~6% of PVA gives the best SERS signal of the Raman probe NBA.

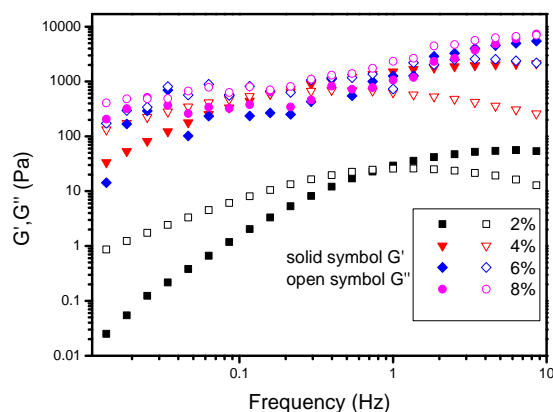

**Figure s2.** Angular frequency dependence of moduli  $G'$  and  $G''$  for SERS slime substrates at various PVA weight percentage (indicated in the Figure). Ag NPs: 5 mM. Borax 4% (w:w) was mixed with the PVA-Ag NPs mixtures at 3:10 ratio (V:V). The diameter of the plate is 40 mm. The interval between the upper and lower plates is 1 mm and the test temperature is 25 °C.

Figure s2 shows the angular frequency dependence of storage modulus ( $G'$ ) and loss modulus ( $G''$ ) for PVA/Ag NPs mixture with various PVA concentrations at constant borax content. It is clear that at relatively low PVA concentrations (2 and 4%),  $G'$  is smaller than  $G''$  at low frequency regime ( $\omega < 1$ ) and  $G'$  is beyond  $G''$  after a crossover point, which is attributed to the formation of weak gel network (sol-gel transition) by PVA complexation with borate ions.<sup>1,2</sup> With the increase of the PVA concentrations (e.g., 4%), the  $G'$  increases and the crossover point shifts toward lower frequency, indicating the increased cross-linking degree of PVA gel due to more PVA chain entanglements between cross-linker (borate).<sup>2</sup> Particularly, when the PVA concentration is over 6%,  $G'$  and  $G''$  curves become almost parallel and present

typical solid-like behavior (i.e. PVA solution nearly loses its flow ability) at all frequency regime.<sup>2,3</sup> In this case, the independence of both moduli on tested frequency suggests the formation of more continuous and compact cross-linked network in the PVA solution, where the PVA chain relaxation is seriously restricted by the chain entanglement and cross-linking with borate.<sup>4</sup>

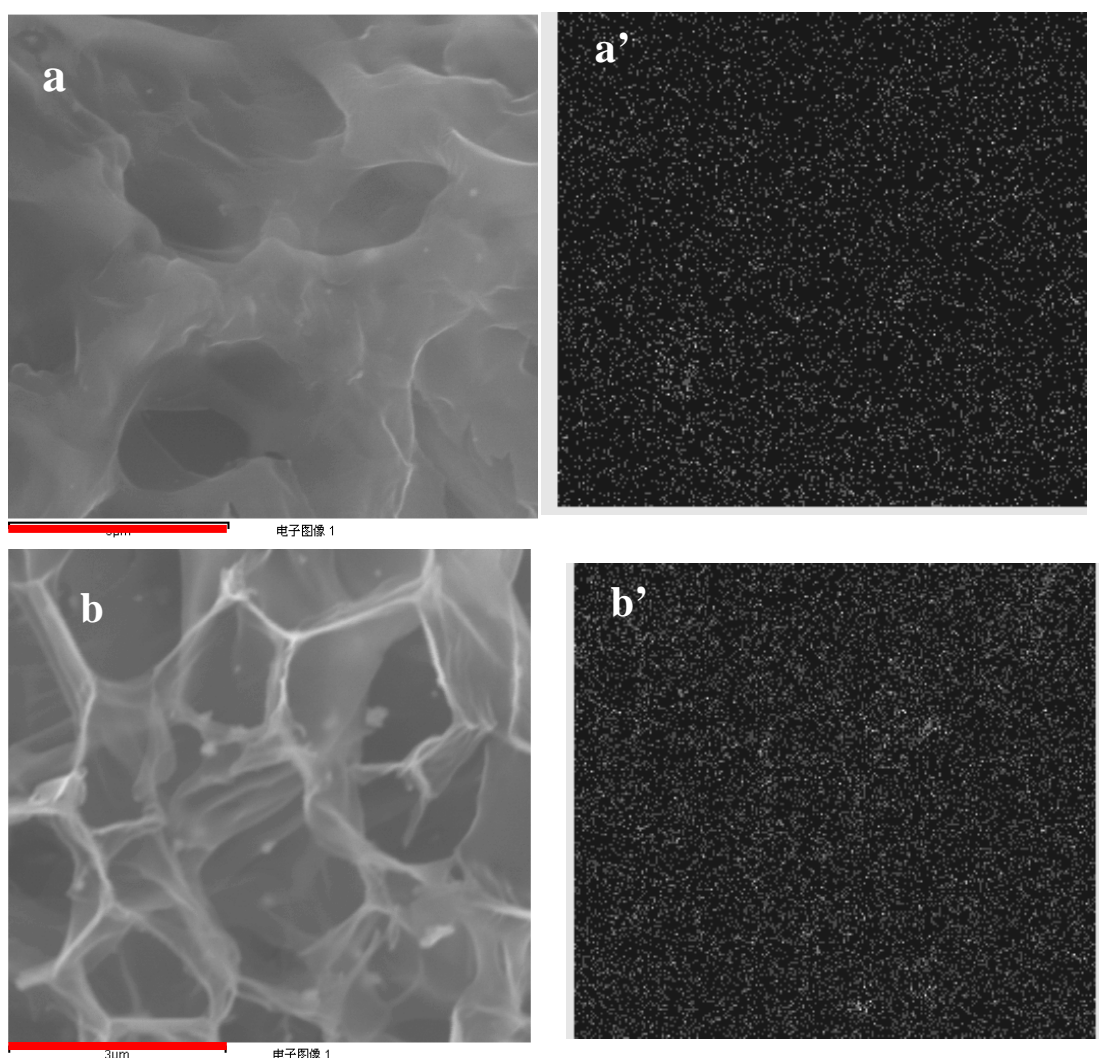

**Figure S3.** Representative SEM of the freeze-dried slime SERS substrate (Scale bar (red) stands for 3  $\mu\text{m}$ ) before (a) and after (b) concentrated by a factor of 6 by

centrifugation. a' and b', EDX mapping of element Ag of the same area of a and b. Average Ag atomic percentage was found to be 0.12% in a(before centrifugation) and 0.65% in b (after centrifugation), respectively.

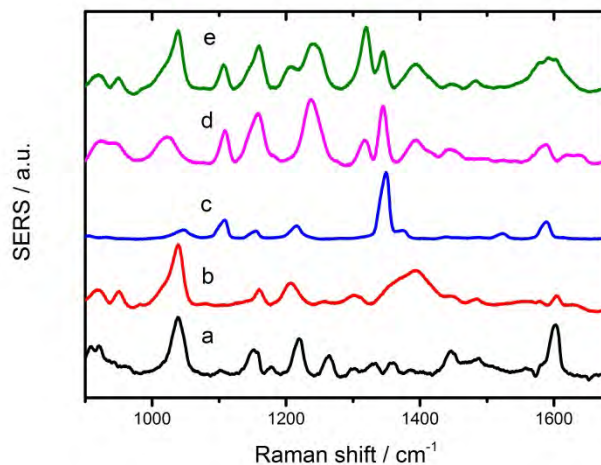

**Figure S4.** a and c, normal Raman of isocarbophos and methyl parathion solid, respectively; b, d, and e, SERS stamping test of 10  $\mu\text{L}$  of 100 ppm (1  $\mu\text{g}$ ) of isocarbophos, parathion, and their mixture on glass, respectively.

1. H.-L. Lin, Y.-F. Liu, T. L. Yu, W.-H. Liu and S.-P. Rwei, *Polymer*, 2005, 46, 5541-5549.
2. J. Han, T. Lei and Q. Wu, *Carbohydrate Polymers*, 2014, 102, 306-316.
3. C. Tang, L. Xiang, J. Su, K. Wang, C. Yang, Q. Zhang and Q. Fu, *Journal of Physical Chemistry B*, 2008, 112, 3876-3881.
4. T. Narita, K. Mayumi, G. Ducouret and P. Hébraud, *Macromolecules*, 2013, 46, 4174-4183.
